# Supplementary material
Source: PubMed Central journal article supplement (PMC8427462)
Supplement: NIHMS1737772-supplement-Supplemental_material.pdf [file NIHMS1737772-supplement-Supplemental_material.pdf]

## Supporting Information

### Room-to-Room Variability of Airborne PCBs in Schools and the Application of Air Sampling for Targeted Source Evaluation

**Authors.** Moala K. Bannavti <sup>‡</sup>, Jacob C. Jahnke <sup>‡</sup>, Rachel F. Marek, Craig L. Just, Keri C. Hornbuckle \*

Department of Civil and Environmental Engineering, IIHR-Hydrosience & Engineering  
University of Iowa, Iowa City, Iowa USA 52242

<sup>‡</sup> MKB and JCJ are co-first authors

\*Corresponding author [keri-hornbuckle@uiowa.edu](mailto:keri-hornbuckle@uiowa.edu) Ph (319 384-0789)

Data generated in this research are available at <https://doi.org/10.25820/data.006136>.<sup>1</sup>

Number of pages: 11

Number of tables: 3

Number of figures: 4

## Methods and Materials

### PUF Extraction

We used accelerated solvent extraction with acetone and hexane (1:1 v/v) to extract PCBs from PUF samples (Tisch Environmental, Cleves, OH, Part # TE-1014). During the ASE preparation, 50 ng of surrogate standards PCB 14 (3,5-dichlorobiphenyl), deuterated PCB 65 (2,3,5,6-tetrachlorobiphenyl -2',3',4',5',6'-d5), and PCB 166 (2,3,4,4',5,6-hexachlorobiphenyl) were added to the PUF to allow for correction due to analytical losses and variability. Recoveries of PCB 14 were used to correct the masses of the mono-, di-, and trichlorinated congeners, d-PCB 65 for the tetra- and pentachlorinated congeners, and PCB 166 for the hexa-, hepta-, octa-, nona-, and decachlorinated congeners. Turbulent evaporation with nitrogen (Biotage TurboVap II Concentration Evaporator Workstation) was used to concentrate the extracts. Extracts were cleaned by passing them through sulfuric acid silica gel columns. Samples were then concentrated again, transferred to 2 mL glass autosampler vials, and spiked with 25 ng of internal standard d-PCB 30 (2,4,6-trichlorobiphenyl-2',3',4',5',6'-d5, C/D/N Isotopes, Pointe-Claire, QC, Canada) and 30 ng of internal standard PCB 204 (2,2',3,4,4',5,6,6'-octachlorobiphenyl, Cambridge Isotope Laboratories, Inc.).

### Instrument Parameters

The GC was equipped with a Supelco SPB-Octyl capillary column (Poly(50% n-octyl/50% methyl siloxane, 30 m × 0.25 mm ID, 0.25 µm film thicknesses)) with UHP helium as the carrier gas (0.8 mL/min) and UHP nitrogen as the collision gas (1.5 mL/min). The GC operated in solvent vent injection mode at the following injection conditions: initial temperature 45 °C, initial time 0.06 min, ramp 600 °C/min to inlet temperature 325 °C at 4.4 psi. The GC oven temperature program was 45 °C for 2 min, 45 to 75 °C at 100 °C/min and hold for 5 min, 75 to 150 °C at 15 °C/min and hold for 1 min, 150 to 280 at 2.5 °C/min and final hold 5 min (total run time 70.86 min). The triple quadrupole MS electron ionization source was set to 260 °C. The MS-MS operated with the precursor-product transitions in **Table S1**.

The limit of quantification (LOQ) calculated from field blanks (n=3) for each PCB congener or group of co-eluting congeners is in **Table S2**.

**Table S1.** PCB precursor and product masses of unlabeled and deuterated calibration standards used in multiple reaction monitoring (MRM) mode on the triple quadrupole mass spectrometer<sup>a</sup>

| Cl homolog | Precursor Mass | Product Mass |
|------------|----------------|--------------|
| mono       | 188            | 152          |
| di         | 222            | 152          |
| tri        | 258            | 186          |
| tetra      | 291.9          | 222          |
| penta      | 325.9          | 255.9        |

|          |       |       |
|----------|-------|-------|
| hexa     | 359.8 | 289.9 |
| hepta    | 393.8 | 323.9 |
| octa     | 429.7 | 359.8 |
| nona     | 463.7 | 393.8 |
| deca     | 497.7 | 427.9 |
| D5 tri   | 261   | 191   |
| D5 tetra | 296.9 | 277   |

<sup>a</sup>Unlabeled standards were from AccuStandard, New Haven, CT, USA. Labeled standards were from C/D/N Isotopes, Pointe-Claire, QC, Canada.

**Table S2.** Limit of quantification (LOQ) for each PCB congener or group of co-eluting congeners in units of nanograms per sample.<sup>a</sup>

| PCB      | LOQ       | PCB           | LOQ      | PCB         | LOQ      | PCB     | LOQ      |
|----------|-----------|---------------|----------|-------------|----------|---------|----------|
| 1        | 0.01362   | 51            | 0.01939  | 106         | 0.000634 | 161     | 0.001098 |
| 2        | 0.0090    | 52            | 0.13024  | 107         | 0        | 162     | 0        |
| 3        | 0.02330   | 54            | 0.01332  | 108+124     | 0.002005 | 164     | 0        |
| 4        | 0.01408   | 55            | 0.004135 | 110         | 0.04368  | 165     | 0        |
| 5        | 0.009455  | 56            | 0.002099 | 111         | 0.000207 | 167     | 0        |
| 6        | 0.01690   | 57            | 0.000505 | 112         | 0.004438 | 169     | 0.000697 |
| 7        | 0.01031   | 58            | 0.001274 | 114         | 0.002736 | 170     | 0.001841 |
| 8        | 0.03618   | 59+62+75      | 0.02111  | 115         | 0.02936  | 171+173 | 0.001087 |
| 9        | 0.01049   | 60            | 0.001877 | 117         | 0.2380   | 172     | 0.008322 |
| 10       | 0.01123   | 61+70+74+76   | 0.05191  | 118         | 0.01122  | 174     | 0.002729 |
| 11       | 0         | 63            | 0.01078  | 120         | 0.000679 | 175     | 0.001903 |
| 12+13    | 0         | 64            | 0.01398  | 121         | 0.001832 | 176     | 0.004274 |
| 15       | 0         | 66            | 0.005476 | 122         | 0.001264 | 177     | 0.001376 |
| 16       | 0.01026   | 67            | 0.002319 | 123         | 0        | 178     | 0        |
| 17       | 0.01235   | 68            | 0.04684  | 126         | 2.731    | 179     | 0.00287  |
| 18+30    | 0.03145   | 72            | 0.08488  | 127         | 0        | 180+193 | 0.01018  |
| 19       | 0.005245  | 73            | 0.01391  | 129+138+163 | 0.02673  | 181     | 0.002802 |
| 20+28    | 0.02489   | 77            | 0.000546 | 130         | 0        | 182     | 0.004314 |
| 21+33    | 0.02489   | 78            | 0.000281 | 131         | 0        | 183     | 0.002484 |
| 22       | 0.01678   | 79            | 0.002586 | 132         | 0.01570  | 184     | 0.008796 |
| 23       | 0.002083  | 80            | 0.000342 | 133         | 0.00267  | 185     | 0.000844 |
| 24       | 0.01444   | 81            | 0.000599 | 134         | 0.003046 | 186     | 0        |
| 25       | 0.006013  | 82            | 0.01058  | 135+151     | 0.01091  | 187     | 0.01083  |
| 26+29    | 0.008147  | 83            | 0.008363 | 136         | 0.004205 | 188     | 0.002924 |
| 27       | 0.008567  | 84            | 0.02595  | 137         | 0.000239 | 189     | 0.000415 |
| 31       | 0.02702   | 85+116        | 0.1289   | 139+140     | 0.004051 | 190     | 0.001737 |
| 32       | 0.01027   | 86+97+109+119 | 0.01805  | 141         | 0.001639 | 191     | 0.001911 |
| 34       | 0.002575  | 87+125        | 0.04770  | 142         | 0        | 192     | 0.002033 |
| 35       | 0         | 88            | 0        | 143         | 0.001187 | 194     | 0.003387 |
| 36       | 0.0000402 | 89            | 0.000108 | 144         | 0.006287 | 195     | 0.001792 |
| 37       | 0         | 90+101+113    | 0.09897  | 145         | 0        | 196     | 0.001777 |
| 38       | 0.000311  | 91            | 0.005508 | 146         | 0.002835 | 197     | 0        |
| 39       | 0.000541  | 92            | 0.01063  | 147+149     | 0.06501  | 198+199 | 0.00481  |
| 40+71    | 0.02343   | 93+100        | 0.004218 | 148         | 0.002136 | 200     | 0        |
| 41       | 0.00392   | 94            | 0        | 150         | 0.000298 | 201     | 0.001487 |
| 42       | 0.004858  | 95            | 0.08511  | 152         | 0.002876 | 202     | 0.02519  |
| 43       | 0.01746   | 96            | 0.006738 | 153+168     | 0.02172  | 203     | 0.004443 |
| 44+47+65 | 0.05624   | 98            | 0.003914 | 154         | 0        | 205     | 0.002632 |
| 45       | 0.01252   | 99            | 0.01776  | 155         | 0.001067 | 206     | 0.00703  |
| 46       | 0.10062   | 102           | 0.000589 | 156+157     | 0        | 207     | 0.001742 |
| 48       | 0.01916   | 103           | 0        | 158         | 0.000373 | 208     | 0.004975 |
| 49+69    | 0.02958   | 104           | 0.003324 | 159         | 0        | 209     | 0.05214  |
| 50+53    | 0.05529   | 105           | 0.000402 | 160         | 0        |         |          |

<sup>a</sup>The LOQ was calculated as the upper limit of the 99% confidence interval of the mass in the blanks (average + 3\*standard deviation).

## Determining Sample Volume

The variable  $K_{PUF}$  is calculated by the empirical equation (Shoeib<sup>2</sup>):

$$\log K_{PUF} = 0.6366 \log K_{OA} - 3.1774 \quad (\text{eq S1})$$

where  $K_{OA}$  is calculated by (Herkert<sup>3</sup>):

$$\log K_{OA(T)} = \log K_{OA(25^\circ C)} - \frac{\Delta U_{OA}}{2.303 \times R} \left( \frac{1}{T} - \frac{1}{298.15} \right) \quad (\text{eq S2})$$

where  $T$  is temperature (K),  $\Delta U_{OA}$  is the internal energy of octanol-air transfer ( $\text{J mol}^{-1}$ ),  $R$  is the gas constant ( $\text{J mol}^{-1} \text{K}^{-1}$ ). The final concentration in air,  $C_{air}$ , is:

$$C_{air} = \frac{M_{PCB}}{V_{eff}} \quad (\text{eq S3})$$

where  $M_{PCB}$  is the concentration of a PCB (ng).

## Windspeed Measurements

The predicted average windspeed used in the Monte Carlo simulation was compared to physical measurements of the unoccupied Practice Gym (**Figure S1**).

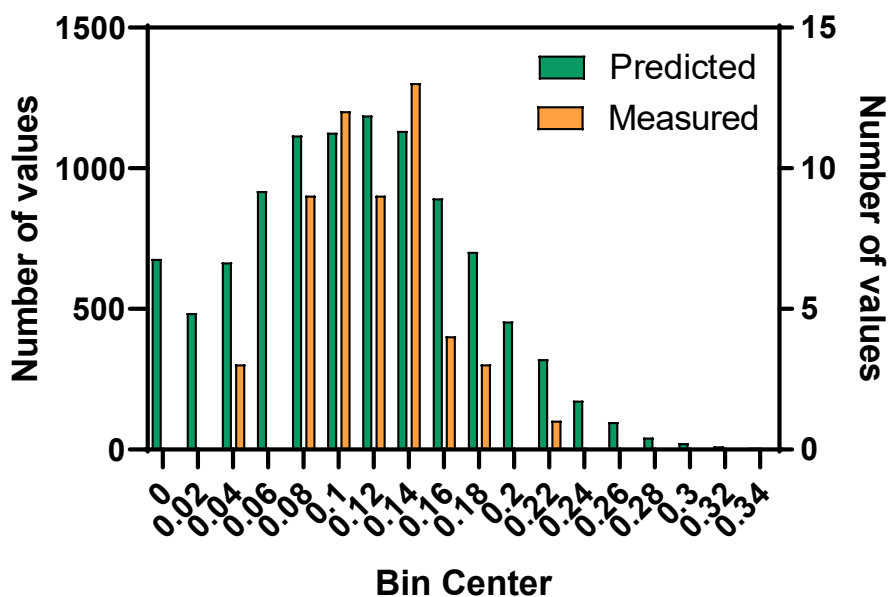

**Figure S1.** Histogram displaying the distribution of windspeeds found in the  $WS_{on}$  parameter used in the Monte Carlo simulation (Predicted, left axis) and in the Practice Gym (Measured, right axis).

### Determining Vaporized Aroclor Profiles

Vaporized Aroclor profiles were determined by multiplying the liquid Aroclor profiles by each congener's vapor pressure and were normalized to the sum of all the congeners.<sup>4</sup> Vapor pressures were found from Fischer et al.<sup>5</sup> To test the validity of this method, the vapor pressure normalized profiles of PCBs in paint colorants were compared to the emission profiles of those same colorants using  $\cos \theta$ .<sup>6</sup> The vaporized colorant profiles matched the emission profiles of the colorants better than the concentrations of PCBs in the colorants without vapor pressure normalization.

**Table S3.** Comparison of the emission profiles of paint colorants to concentration profiles with and without vapor pressure normalization.

| Cos $\theta$ Between:          | D Colorant Concentration  | D Colorant with Vapor Pressure Normalization  |
|--------------------------------|---------------------------|-----------------------------------------------|
| D (Green) Colorant Emissions   | 0.035                     | 0.93                                          |
|                                |                           |                                               |
| Cos $\theta$ Between:          | DD Colorant Concentration | DD Colorant with Vapor Pressure Normalization |
| DD (Maroon) Colorant Emissions | 0.91                      | 0.99                                          |

## Results

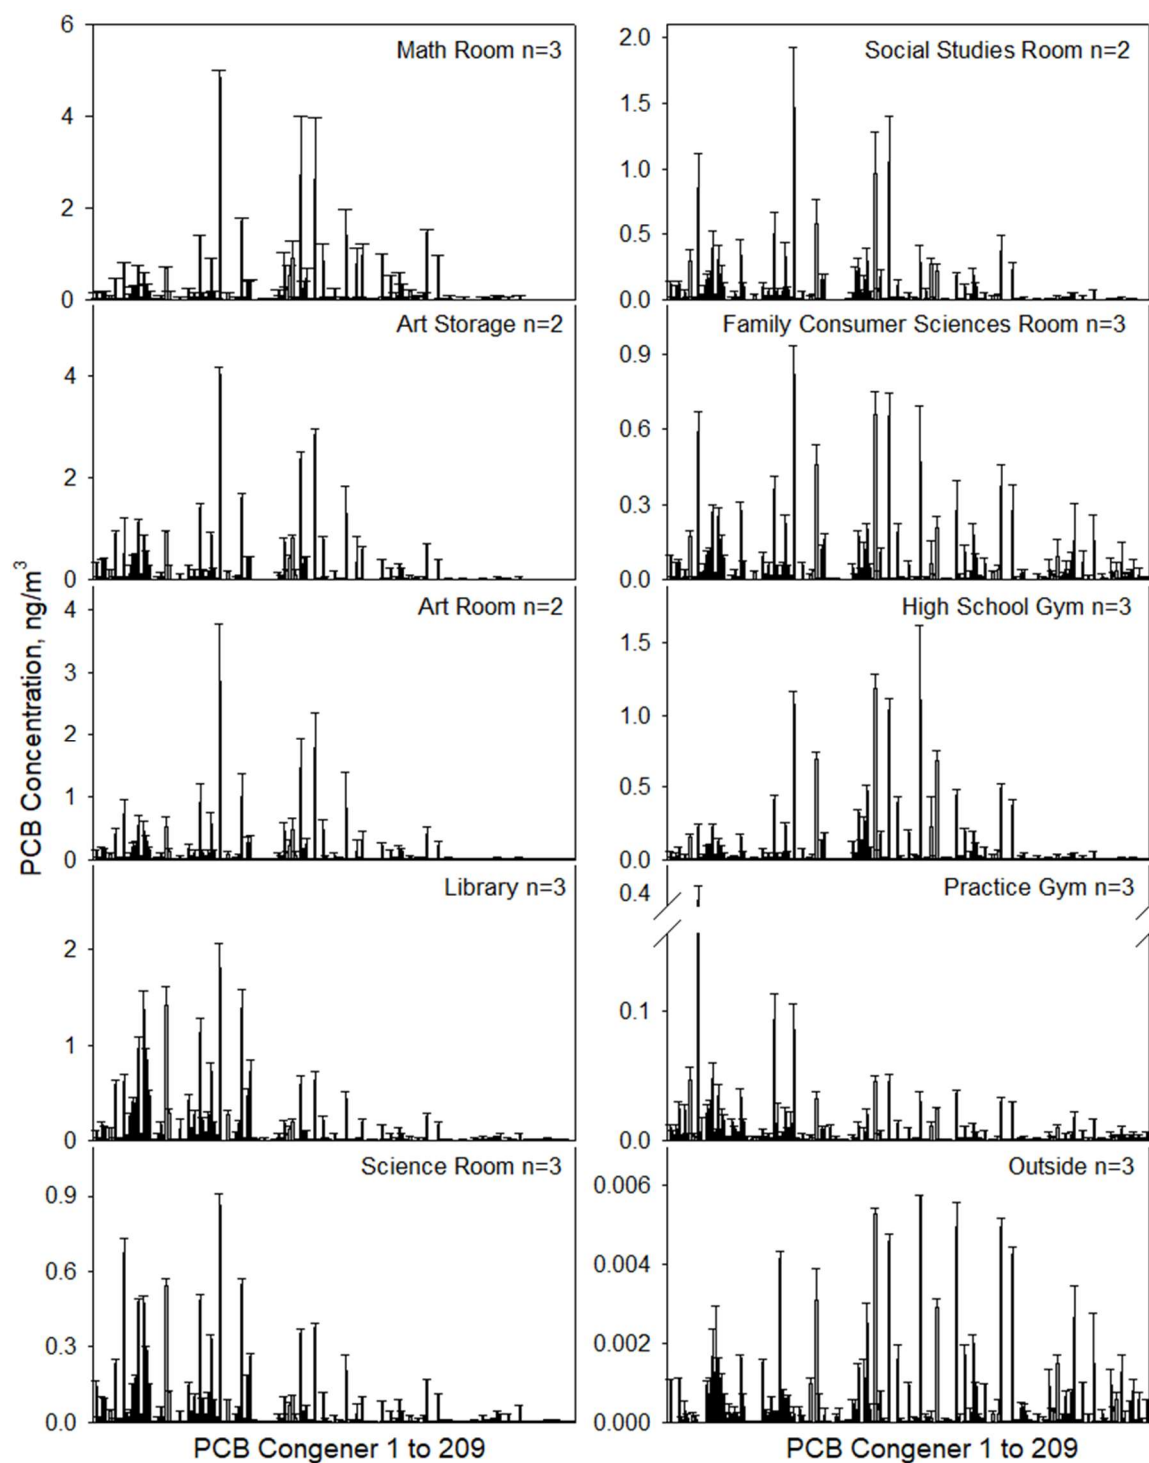

**Figure S2.** PCB Concentration of 209 congeners in each sampling location. The error bars represent standard deviation for all n=3 and the range (minimum and maximum) for all n=2.

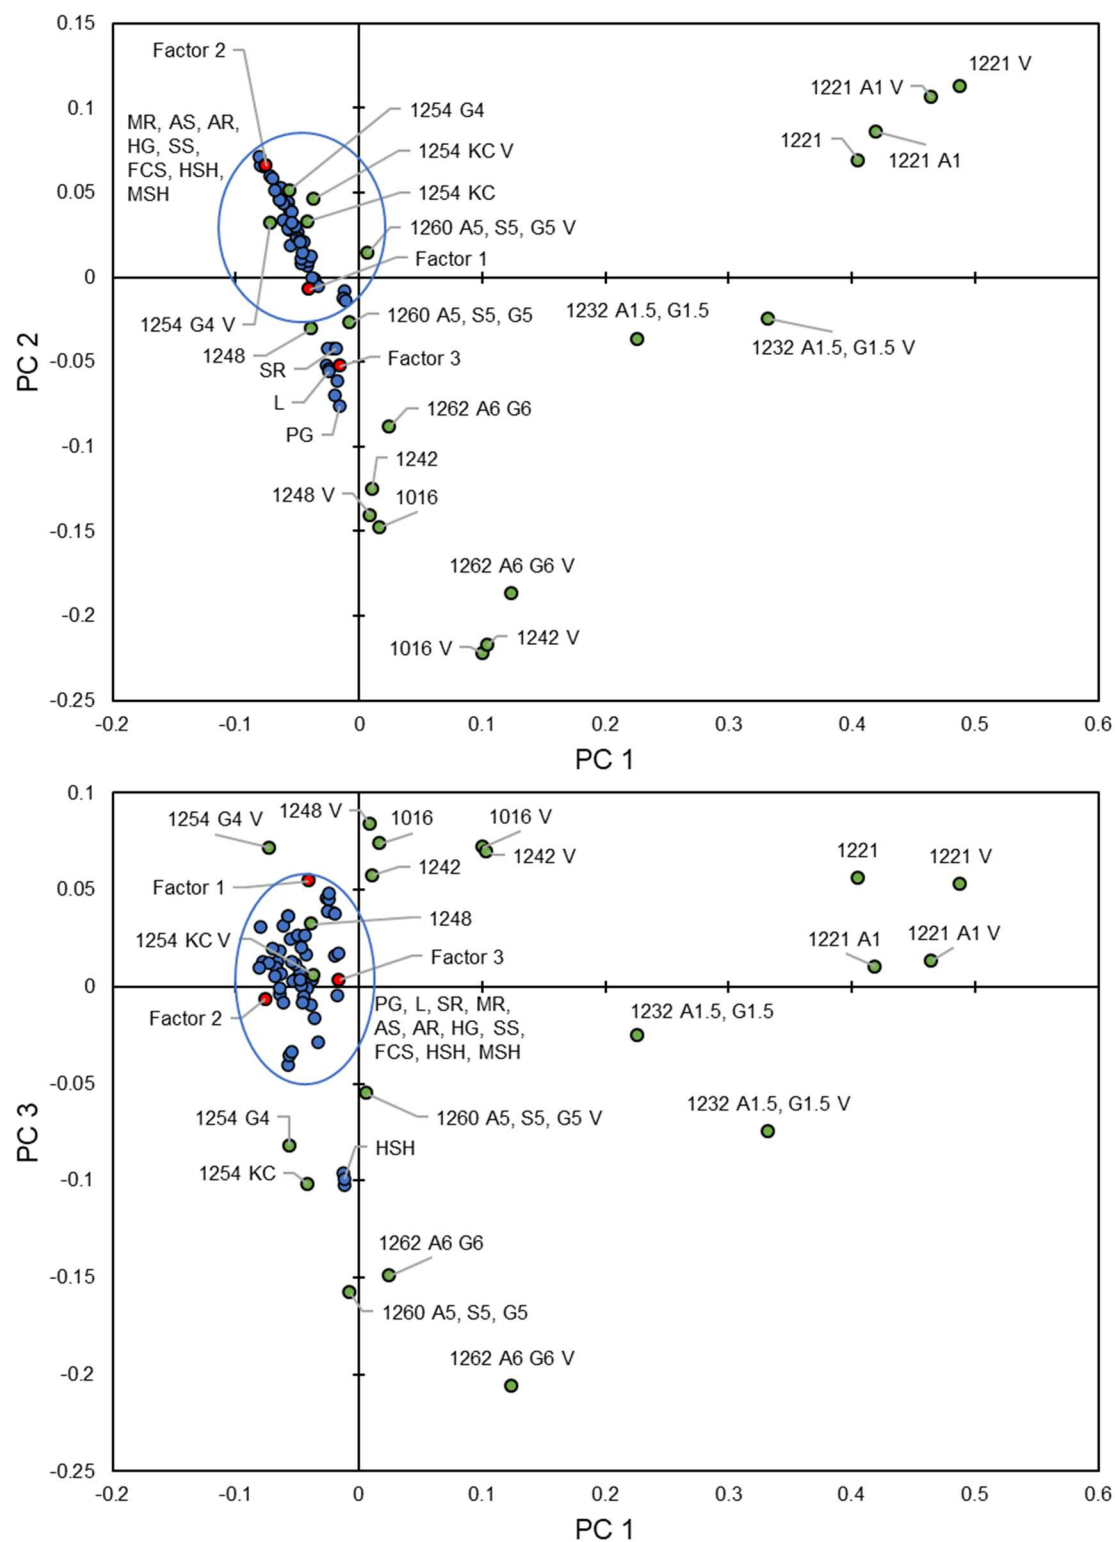

**Figure S3.** Groupings of PCBs for Principal Component (PC) 2 vs. PC1 (top) and PC3 vs PC1 (bottom). Green markers are Aroclors, red markers are the Factors, and the blue markers are the school air samples. Triplicate samples are shown but some data points overlap. The larger, blue circles indicate samples that are grouped together.

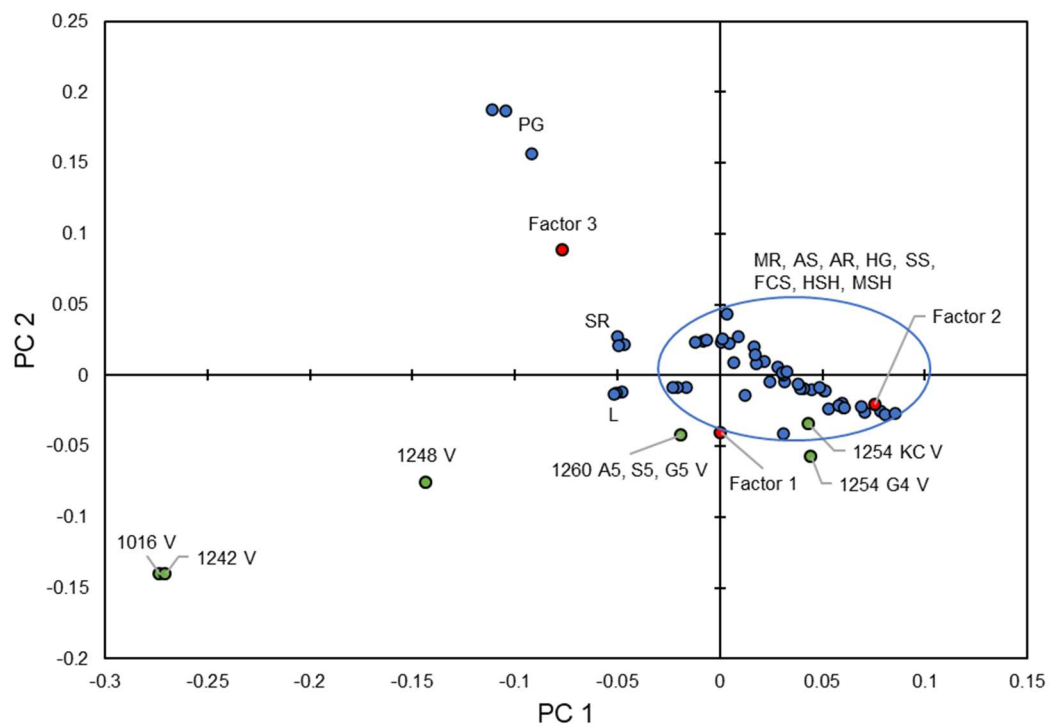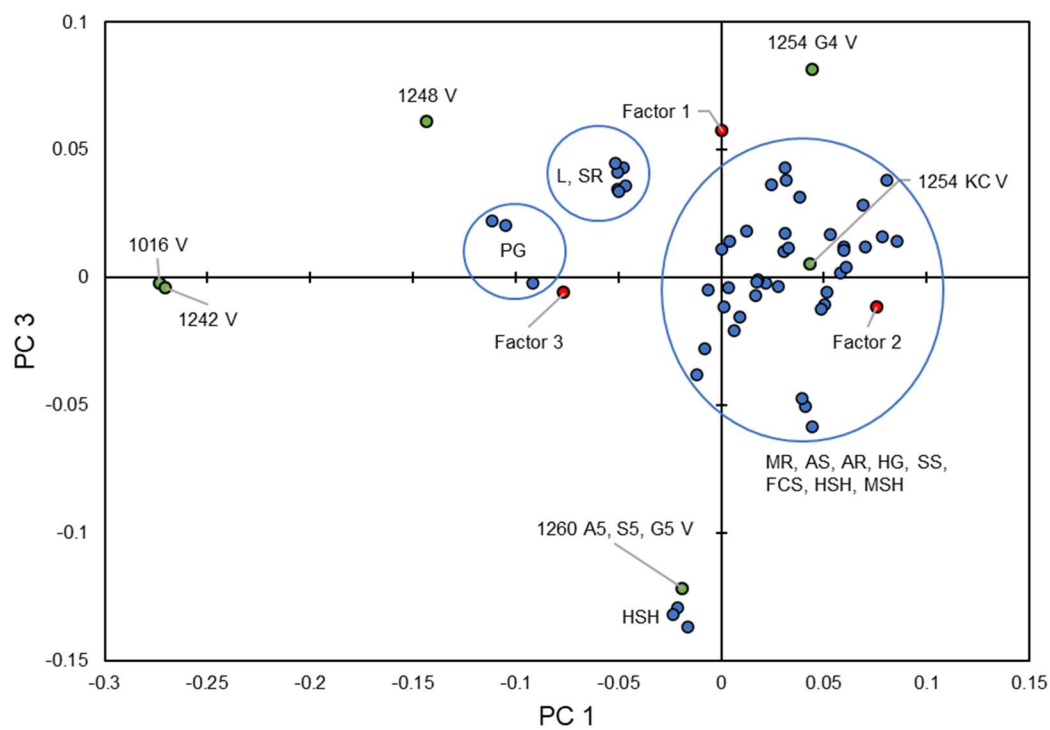

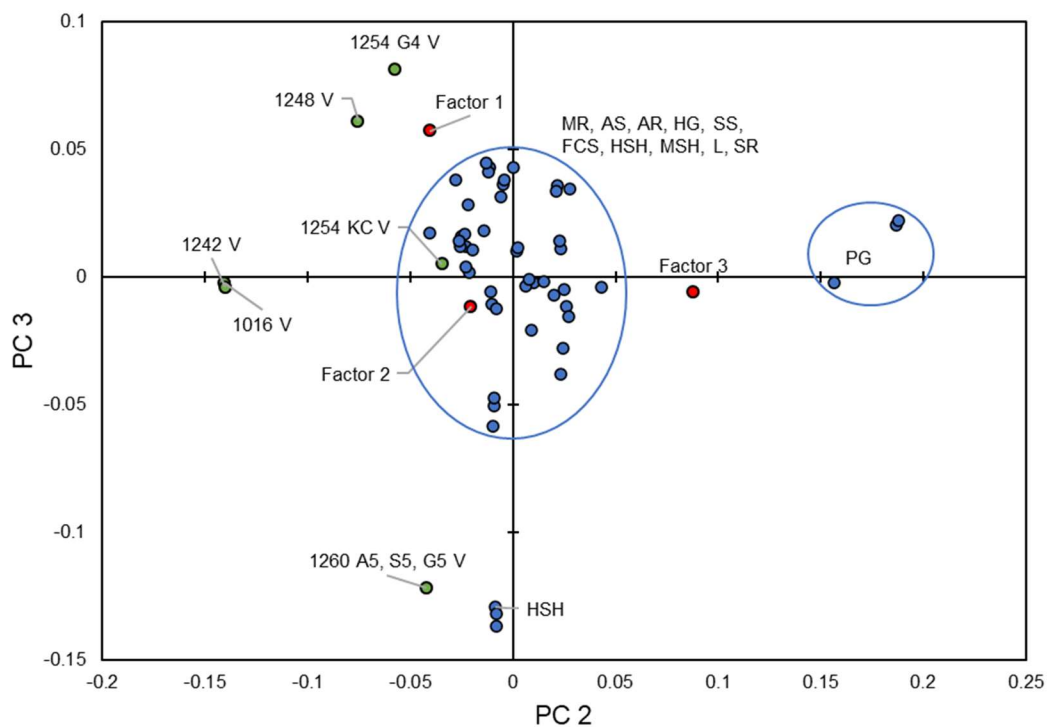

**Figure S4.** Groupings of PCBs for Principal Component (PC) 2 vs PC1 (top), PC 3 vs PC1 (middle), and PC3 vs PC2 (bottom). Green markers are Aroclors, red markers are the Factors, and the blue markers are the school air samples. Triplicate samples are shown but some data points overlap. Aroclors that did not fit the data well in **Figure S3** have been removed. PC 1 described 42.1% of the data, PC 2 described 24.3% of the data, and PC 3 described 15.9% of the data. Combined these 3 principal components described 82.3% of the data. The larger, blue circles indicate samples that are grouped together.

## Literature Cited

1. Bannavti, M. K.; Jahnke, Jacob C. ; Marek, Rachel F. ; Hornbuckle, Keri C., Dataset for Room-to-Room Variability of Airborne PCBs in Schools and the Application of Air Sampling for Targeted Source Evaluation. In University of Iowa, **2021**.
2. Shoeib, M.; Harner, T., Characterization and comparison of three passive air samplers for persistent organic pollutants. *Environ Sci Technol* **2002**, *36*, (19), 4142-4151.
3. Herkert, N. J.; Martinez, A.; Hornbuckle, K. C., A Model Using Local Weather Data to Determine the Effective Sampling Volume for PCB Congeners Collected on Passive Air Samplers. *Environ Sci Technol* **2016**, *50*, (13), 6690-6697.
4. Rodenburg, L. A.; Meng, Q., Source apportionment of polychlorinated biphenyls in Chicago air from 1996 to 2007. *Environ Sci Technol* **2013**, *47*, (8), 3774-80.
5. Fischer, R. C.; Wittlinger, R.; Ballschmiter, K., Retention-Index Based Vapor-Pressure Estimation for Polychlorobiphenyl (Pcb) by Gas-Chromatography. *Fresen J Anal Chem* **1992**, *342*, (4-5), 421-425.
6. Jahnke, J. C.; Hornbuckle, K. C., PCB Emissions from Paint Colorants. *Environ Sci Technol* **2019**, *53*, (9), 5187-5194.
